# Supplementary material for: Perceived Barriers to Antepartum HIV Medication Adherence in HIV Infected Pregnant Women
Source: Infect Dis Obstet Gynecol. 2018 Oct 16;2018:4049212. doi: 10.1155/2018/4049212 (PMC6206578; doi:10.1155/2018/4049212)
Supplement: Supplementary Materials — This supplementary file includes the survey utilized for the study. [file 4049212.f1.zip]

Archive with 3 entries (2 files):
- 4049212.f1/
- 4049212.f1/4049212 supplementary files_IDOG_2502578.pdf
- 4049212.f1/4049212 supplementary files_IDOG_2502579.docx
